# Supplementary material for: Transient Existence of Circulating Mesenchymal Stem Cells in the Deep Veins in Humans Following Long Bone Intramedullary Reaming
Source: PubMed Central journal article supplement (PMC7230570; doi:10.3390/jcm9040968), 2020-03-31
Supplement: jcm-09-00968-s001.pdf [file jcm-09-00968-s001.pdf]

## **Supplementary information**

**Full Title:** Transient existence of circulating multipotential stromal cells in the Deep Veins in Man following long bone intramedullary reaming.

**Authors:** Sarah M Churchman PhD<sup>1,2</sup> , Elena A Jones PhD<sup>1,2</sup>, Tarek Roshdy MD<sup>1</sup>, George Cox MD<sup>1</sup>, Sally A Boxall PhD<sup>1</sup>, Dennis McGonagle FRCPI PhD<sup>1,2\*#</sup> Peter V Giannoudis MB MD FACS FRCS<sup>2,3#</sup>

## CONTENTS

Supplementary Table 1. Surgical patient information

Supplementary Table 2. Rheumatoid arthritis patient information

Supplementary Table 3. Taqman assays used

Supplementary Figure 1A (*ACTA1-GATA2*) Relative gene expression in MSCs of different origin

Supplementary Figure 1B (*GHR-WIF1*) Relative gene expression in MSCs of different origin

Supplementary Figure 2 Genes with no overlapping gene expression between PVB- and FVB-MSCs

**Supplementary Table 1. Surgical patient information**

| <b>Surgical Group</b>    | <b>Donor number</b> | <b>Gender</b> | <b>Age</b> | <b>Diagnosis</b>                           |
|--------------------------|---------------------|---------------|------------|--------------------------------------------|
| Concomitant with reaming | 1                   | Male          | 40         | IM nailing of closed tibial shaft fracture |
| Concomitant with reaming | 2                   | Male          | 28         | IM nailing of closed tibial shaft fracture |
| Concomitant with reaming | 3                   | Female        | 46         | IM nailing of closed tibial shaft fracture |
| Concomitant with reaming | 4                   | Male          | 30         | IM nailing of closed tibial shaft fracture |
| Concomitant with reaming | 5                   | Female        | 53         | IM nailing of closed tibial shaft fracture |
| Concomitant with reaming | 6                   | Male          | 18         | IM nailing of closed tibial shaft fracture |
| Concomitant with reaming | 7                   | Male          | 21         | IM nailing of closed tibial shaft fracture |
| Concomitant with reaming | 8                   | Female        | 53         | IM nailing of closed tibial shaft fracture |
| Concomitant with reaming | 9                   | Male          | 73         | IM nailing of closed tibial shaft fracture |
| Post-reaming             | 1                   | Male          | 19         | Nonunion femur                             |
| Post-reaming             | 2                   | Female        | 50         | Nonunion femur                             |
| Post-reaming             | 3                   | Male          | 22         | Nonunion femur                             |
| Post-reaming             | 4                   | Female        | 64         | Nonunion tibia                             |
| Post-reaming             | 5                   | Male          | 33         | Nonunion femur                             |
| Post-reaming             | 6                   | Male          | 43         | Nonunion femur                             |
| Post-reaming             | 7                   | Male          | 62         | Nonunion tibia                             |
| Post-reaming             | 8                   | Male          | 63         | Nonunion femur                             |
| Post-reaming             | 9                   | Female        | 58         | Nonunion tibia                             |
| Post-reaming             | 10                  | Female        | 44         | Nonunion tibia                             |
| Post-reaming             | 11                  | Male          | 38         | Nonunion tibia                             |
| Post-reaming             | 12                  | Female        | 24         | Nonunion tibia                             |
| Post-reaming             | 13                  | Female        | 50         | Non union tibia                            |
| Post-reaming             | 14                  | Female        | 45         | Non union tibia                            |
| Post-reaming             | 15                  | Male          | 66         | Non union radius                           |
| Prior surgery            | 1                   | Female        | 39         | Sacroilitis for sacroiliac screws          |
| Prior surgery            | 2                   | Male          | 67         | Removal of metal work ankle                |
| Prior surgery            | 3                   | Male          | 62         | Removal of metal work tibia                |
| Prior surgery            | 4                   | Female        | 42         | Sacroilitis for sacroiliac screws          |
| Prior surgery            | 5                   | Male          | 21         | Removal of metal work tibia                |
| Prior surgery            | 6                   | Male          | 18         | Osteomyelitis tibia for debridement        |
| Prior surgery            | 7                   | Female        | 46         | Coccyx dinea for local injection           |
| Prior surgery            | 8                   | Male          | 18         | Osteomyelitis tibia for debridement        |
| Prior surgery            | 9                   | Male          | 42         | Sacroilitis for sacroiliac screws          |
| Prior surgery            | 10                  | Male          | 41         | Meniscal tear of knee for arthroscopy      |
| Prior surgery            | 11                  | Female        | 31         | Sacroilitis for sacroiliac screws          |
| Prior surgery            | 12                  | Male          | 38         | Osteomyelitis tibia for debridement        |

**Supplementary Table 2. Rheumatoid arthritis patient information**

| RA category | Donor number | Sex    | Age | CRP<br>(mg/l) | ESR<br>(mm/h) | Plasma<br>viscosity<br>(mPa.s) | RF<br>(Iu/ml) | AntiCCP<br>(U/ml) |
|-------------|--------------|--------|-----|---------------|---------------|--------------------------------|---------------|-------------------|
| Early       | 1            | Female | 77  | <5.0          | 11            | 1.53                           | 66            | 1.5               |
| Early       | 2            | Female | 37  | 27            | 39            | na                             | <15           | 0.4               |
| Early       | 3            | Female | 41  | <5.0          | 12            | na                             | 41            | 7.7               |
| Early       | 4            | Female | 59  | 34            | 42            | na                             | 63            | 1.1               |
| Early       | 5            | Male   | 70  | <5.0          | 10            | na                             | 210           | 101               |
| Early       | 6            | Male   | 74  | 28            | na            | 1.73                           | 65            | >300.0            |
| Early       | 7            | Female | 51  | <5.0          | na            | 1.74                           | <15           | 2.10              |
| Early       | 8            | Male   | 49  | 56            | na            | 2.03                           | <15           | 1.70              |
| Early       | 9            | Female | 73  | 54            | 9             | na                             | 22            | 16                |
| Early       | 10           | Male   | 73  | <5.0          | 9             | na                             | <15           | 2.6               |
| Early       | 11           | Female | 49  | <5.0          | 9             | na                             | 115           | 7.3               |
| Early       | 12           | Female | 23  | 46            | 7             | na                             | 31            | 1.0               |
| Early       | 13           | Female | 52  | 23            | na            | na                             | 425           | 24.4              |
| Early       | 14           | Female | 48  | <5            | na            | na                             | 624           | 77.30             |
| Early       | 15           | Female | 51  | 17.9          | 56            | 1.81                           | 71            | >300.0            |
| Established | 1            | Female | 45  | 10.1          | 59            | na                             | <15           | >300.0            |
| Established | 2            | Female | 41  | <5            | 9             | 1.54                           | 15            | 0.50              |
| Established | 3            | Male   | 56  | <5            | 3             | na                             | 60            | >300.00           |
| Established | 4            | Female | 47  | <5            | 24            | 1.74                           | <15           | <0.50             |
| Established | 5            | Male   | 66  | <5            | 8             | na                             | 119           | >300.0            |
| Established | *6           | Female | 34  | 5.9           | 26            | na                             | 51            | 1.6               |
| Established | 7            | Female | 42  | <5            | na            | na                             | 52            | 10.9              |
| Established | 8            | Male   | 48  | <5            | na            | na                             | 234           | >300.0            |
| Established | 9            | Female | 54  | <5            | 50            | na                             | 98            | 253.5             |
| Established | 10           | Male   | 54  | <5            | 5             | na                             | 16            | >300.0            |
| Established | 11           | Female | 32  | <5            | na            | 1.45                           | <15           | 111.2             |

Early RA is defined by < 1 year disease duration. CRP = C-reactive protein, ESR = erythrocyte sedimentation rate, RF = rheumatoid factor, CCP = cyclic citrullinated peptide. na = not available. \* yielded 1 colony

Supplementary Table 3. Taqman assays used

| <b>Taqman assay identification</b> | <b>Gene Symbol</b> | <b>Description</b>                                               |
|------------------------------------|--------------------|------------------------------------------------------------------|
| Hs00909449_m1                      | <b>ACTA2</b>       | actin, alpha 2, smooth muscle, aorta                             |
| Hs00244715_m1                      | <b>ACVR1B</b>      | activin A receptor, type IB                                      |
| Hs00155658_m1                      | <b>ACVR2A</b>      | activin A receptor, type IIA                                     |
| Hs00758162_m1                      | <b>ALPL</b>        | alkaline phosphatase                                             |
| Hs00181613_m1                      | <b>ANGPT1</b>      | angiopoietin 1                                                   |
| Hs01101127_m1                      | <b>ANGPTL4</b>     | angiopoietin-like 4                                              |
| Hs03044164_m1                      | <b>BAMBI</b>       | BMP and activin membrane-bound inhibitor homolog                 |
| Hs00609452_g1                      | <b>BGLAP</b>       | bone gamma-carboxyglutamate (gla) protein/ osteocalcin           |
| Hs00154192_m1                      | <b>BMP2</b>        | bone morphogenetic protein 2                                     |
| Hs00234930_m1                      | <b>BMP5</b>        | bone morphogenetic protein 5                                     |
| Hs00403062_m1                      | <b>BMPER</b>       | BMP binding endothelial regulator                                |
| Hs00831730_s1                      | <b>BMPR1A</b>      | bone morphogenetic protein receptor, type IA                     |
| Hs00156438_m1                      | <b>CDH11</b>       | cadherin 11, type 2, OB-cadherin (osteoblast)                    |
| Hs00269972_s1                      | <b>CEBPA</b>       | CCAAT/enhancer binding protein (C/EBP), alpha                    |
| Hs00166657_m1                      | <b>COL10A1</b>     | collagen, type X, alpha 1                                        |
| Hs01076777_m1                      | <b>COL1A1</b>      | collagen, type I, alpha 1                                        |
| Hs01028971_m1                      | <b>COL1A2</b>      | collagen, type I, alpha 2                                        |
| Hs00264051_m1                      | <b>COL2A1</b>      | collagen, type II, alpha 1                                       |
| Hs00426981_m1                      | <b>CSPG4</b>       | chondroitin sulfate proteoglycan 4/ NG2                          |
| Hs00171022_m1                      | <b>CXCL12</b>      | chemokine (C-X-C motif) ligand 12/ stromal cell-derived factor 1 |
| Hs00322497_m1                      | <b>DAAM2</b>       | dishevelled associated activator of morphogenesis 2              |
| Hs00178815_m1                      | <b>DDR2</b>        | discoidin domain receptor tyrosine kinase 2                      |
| Hs00182901_m1                      | <b>DVL2</b>        | dishevelled, dsh homolog 2                                       |
| Hs00358886_m1                      | <b>EFNA1</b>       | ephrin-A1                                                        |
| Hs00174752_m1                      | <b>EPHB4</b>       | EPH receptor B4                                                  |
| Hs00191912_m1                      | <b>EPYC</b>        | epiphygan                                                        |
| Hs00609791_m1                      | <b>FABP4</b>       | fatty acid binding protein 4, adipocyte                          |
| Hs00170454_m1                      | <b>FGF5</b>        | fibroblast growth factor 5                                       |
| Hs00241111_m1                      | <b>FGFR1</b>       | fibroblast growth factor receptor 1                              |
| Hs00179829_m1                      | <b>FGFR3</b>       | fibroblast growth factor receptor 3                              |
| Hs00173503_m1                      | <b>FRZB</b>        | frizzled-related protein/ secreted frizzled-related protein 3    |
| Hs00268943_s1                      | <b>FZD1</b>        | frizzled homolog 1                                               |
| Hs00201853_m1                      | <b>FZD4</b>        | frizzled homolog 4                                               |
| Hs00275833_s1                      | <b>FZD7</b>        | frizzled homolog 7                                               |
| Hs00259040_s1                      | <b>FZD8</b>        | frizzled homolog 8                                               |
| Hs00268954_s1                      | <b>FZD9</b>        | frizzled homolog 9                                               |
| Hs99999905_m1                      | <b>GAPDH</b>       | glyceraldehyde-3-phosphate dehydrogenase                         |
| Hs00231119_m1                      | <b>GATA2</b>       | GATA binding protein 2                                           |
| Hs01075601_m1                      | <b>GHR</b>         | growth hormone receptor                                          |
| Hs00748445_s1                      | <b>GJA1</b>        | gap junction protein, alpha 1, 43kDa/ Connexin 43                |
| Hs99999909_m1                      | <b>HPRT1</b>       | hypoxanthine phosphoribosyltransferase 1                         |
| Hs01005963_m1                      | <b>IGF2</b>        | insulin-like growth factor 2 (somatomedin A),INS-IGF2            |
| Hs00181211_m1                      | <b>IGFBP3</b>      | insulin-like growth factor binding protein 3                     |
| Hs00961622_m1                      | <b>IL10</b>        | interleukin 10                                                   |
| Hs00174202_m1                      | <b>IL7</b>         | interleukin 7                                                    |

|               |                  |                                                                         |
|---------------|------------------|-------------------------------------------------------------------------|
| Hs01070036_m1 | <b>JAG1</b>      | jagged 1                                                                |
| Hs00174492_m1 | <b>LEPR</b>      | leptin receptor                                                         |
| Hs01012571_m1 | <b>LPL</b>       | lipoprotein lipase                                                      |
| Hs00174838_m1 | <b>MCAM</b>      | melanoma cell adhesion molecule/ CD146                                  |
| Hs00427183_m1 | <b>MSX1</b>      | msh homeobox 1                                                          |
| Hs02379661_g1 | <b>MT2A</b>      | metallothionein 2A                                                      |
| Hs00159522_m1 | <b>MYH9</b>      | myosin, heavy chain 9, non-muscle                                       |
| Hs02387400_g1 | <b>NANOG</b>     | Nanog homeobox                                                          |
| Hs00707120_s1 | <b>NES</b>       | nestin                                                                  |
| Hs00182120_m1 | <b>NGFR</b>      | nerve growth factor receptor (TNFR superfamily, member 16)/ CD271       |
| Hs00918411_s1 | <b>NGFRAP1</b>   | nerve growth factor receptor (TNFRSF16) associated protein 1            |
| Hs00271352_s1 | <b>NOG</b>       | noggin                                                                  |
| Hs00192325_m1 | <b>OMD</b>       | osteomodulin                                                            |
| Hs00170179_m1 | <b>PCOLCE</b>    | procollagen C-endopeptidase enhancer                                    |
| Hs00998018_m1 | <b>PDGFRA</b>    | platelet-derived growth factor receptor, alpha polypeptide              |
| Hs00185122_m1 | <b>PDGFRL</b>    | platelet-derived growth factor receptor-like                            |
| Hs01370291_g1 | <b>PHOSPHO1</b>  | phosphatase, orphan 1                                                   |
| Hs00999632_g1 | <b>POU5F1</b>    | POU class 5 homeobox 1 (Oct 4)                                          |
| Hs01115513_m1 | <b>PPARG</b>     | peroxisome proliferator-activated receptor gamma                        |
| Hs00231079_m1 | <b>RUNX1</b>     | runt-related transcription factor 1                                     |
| Hs00231692_m1 | <b>RUNX2</b>     | runt-related transcription factor 2                                     |
| Hs00173499_m1 | <b>S1PR1</b>     | sphingosine-1-phosphate receptor 1                                      |
| Hs00610060_m1 | <b>SFRP1</b>     | secreted frizzled-related protein 1                                     |
| Hs00180066_m1 | <b>SFRP4</b>     | secreted frizzled-related protein 4                                     |
| Hs00361747_m1 | <b>SORT1</b>     | sortilin 1                                                              |
| Hs01053049_s1 | <b>SOX2</b>      | SRY (sex determining region Y)-box 2                                    |
| Hs00165814_m1 | <b>SOX9</b>      | SRY (sex determining region Y)-box 9                                    |
| Hs00277762_m1 | <b>SPARC</b>     | secreted protein, acidic, cysteine-rich/ osteonectin                    |
| Hs00959010_m1 | <b>SPP1</b>      | osteopontin/ secreted phosphoprotein 1/ bone sialoprotein I             |
| Hs00559661_m1 | <b>TGFBR2</b>    | transforming growth factor, beta receptor II (70/80kDa)                 |
| Hs00234257_m1 | <b>TGFBR3</b>    | transforming growth factor, beta receptor III                           |
| Hs00900360_m1 | <b>TNFRSF11B</b> | tumor necrosis factor receptor superfamily, member 11b/ osteoprotegerin |
| Hs00361186_m1 | <b>TWIST1</b>    | twist homolog 1                                                         |
| Hs00382379_m1 | <b>TWIST2</b>    | twist homolog 2                                                         |
| Hs00900058_m1 | <b>VEGFA</b>     | vascular endothelial growth factor A                                    |
| Hs01099206_m1 | <b>VEGFC</b>     | vascular endothelial growth factor C                                    |
| Hs00183662_m1 | <b>WIF1</b>      | WNT inhibitory factor 1                                                 |

*HPRT* was used as the reference gene; *GAPDH* was used as a technical internal control only

**Supplementary Figure 1A (*ACTA1-GATA2*) Relative gene expression in MSCs of different origin**

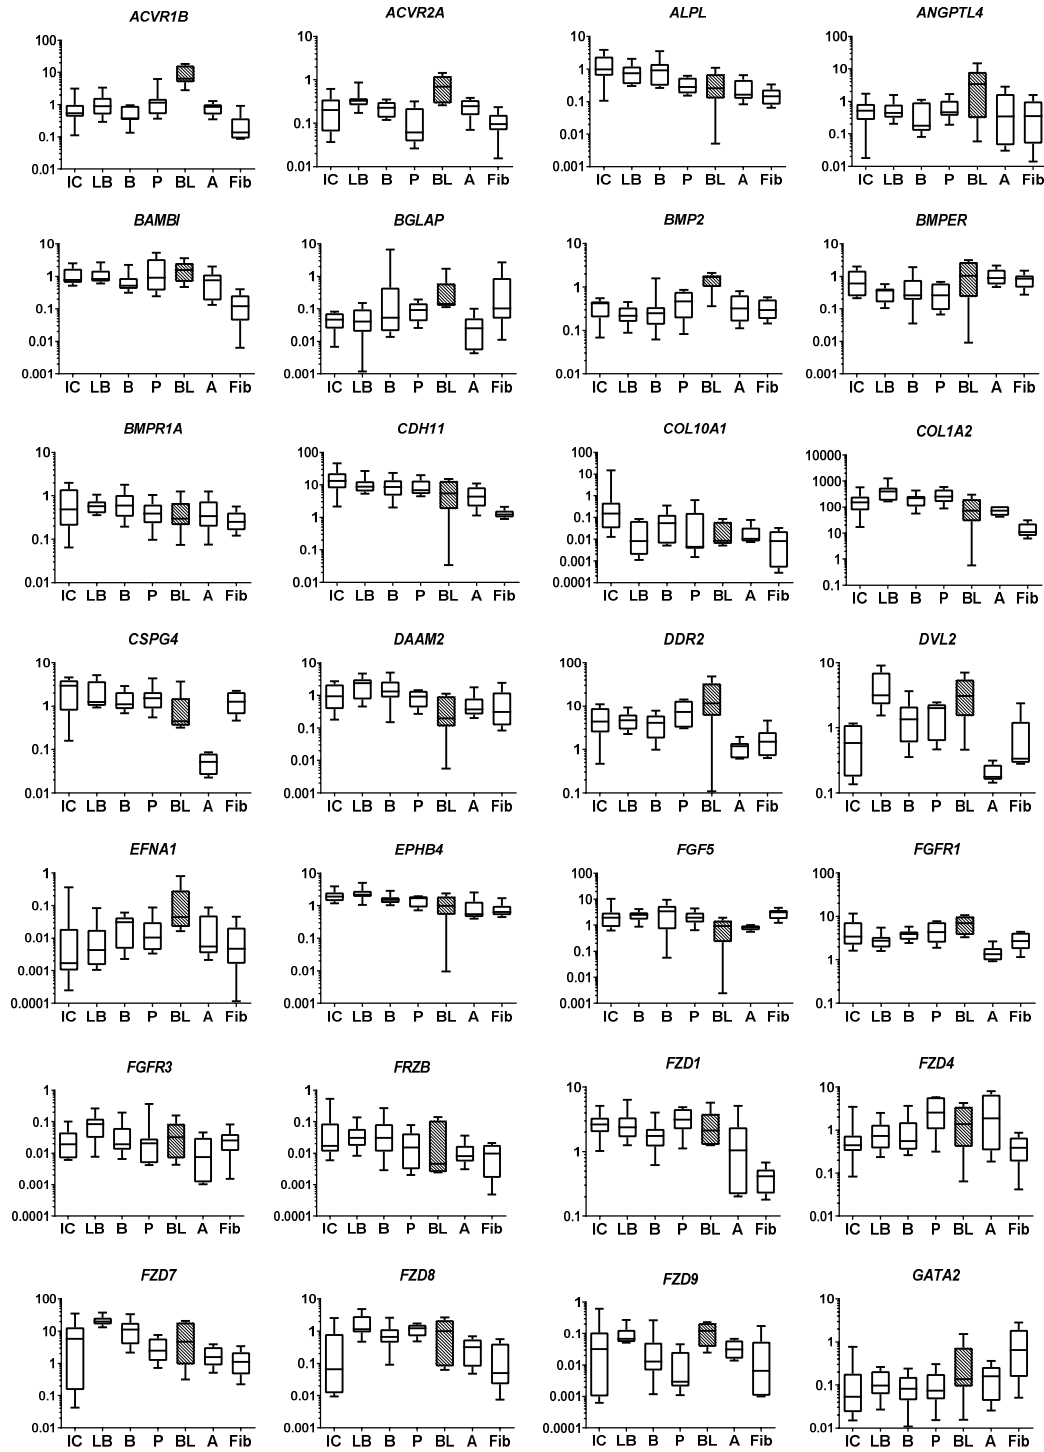

Gene expression normalised to *HPRT* using  $2^{-\Delta C_t}$ . IC=iliac crest marrow, LB=long-bone marrow, B=control bone, P=periosteum, BL=blood, A=adipose, Fib=fibroblast

Supplementary Figure 1B (*GHR-WIF1*) Relative gene expression in MSCs of different origin

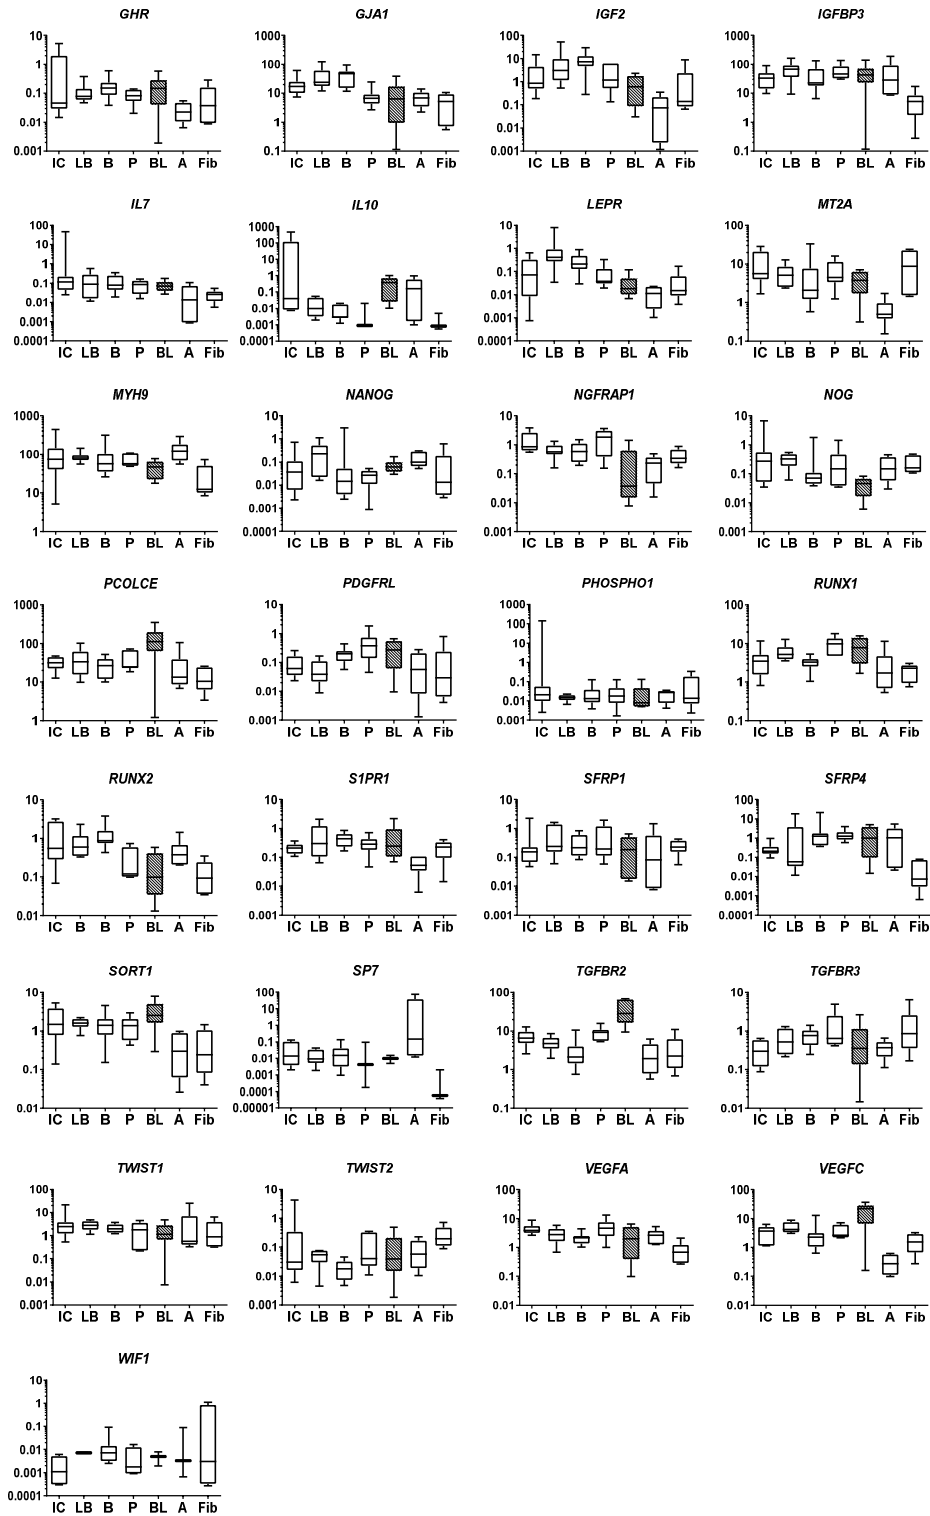

Gene expression normalised to *HPRT* using  $2^{-\Delta C_t}$ . IC=iliac crest marrow, LB=long-bone marrow, B=control bone, P=periosteum, BL=blood, A=adipose, Fib=fibroblast



**Supplementary Figure 2 Thirty-one genes with no overlapping gene expression between PVB- and FVB-MSCs**

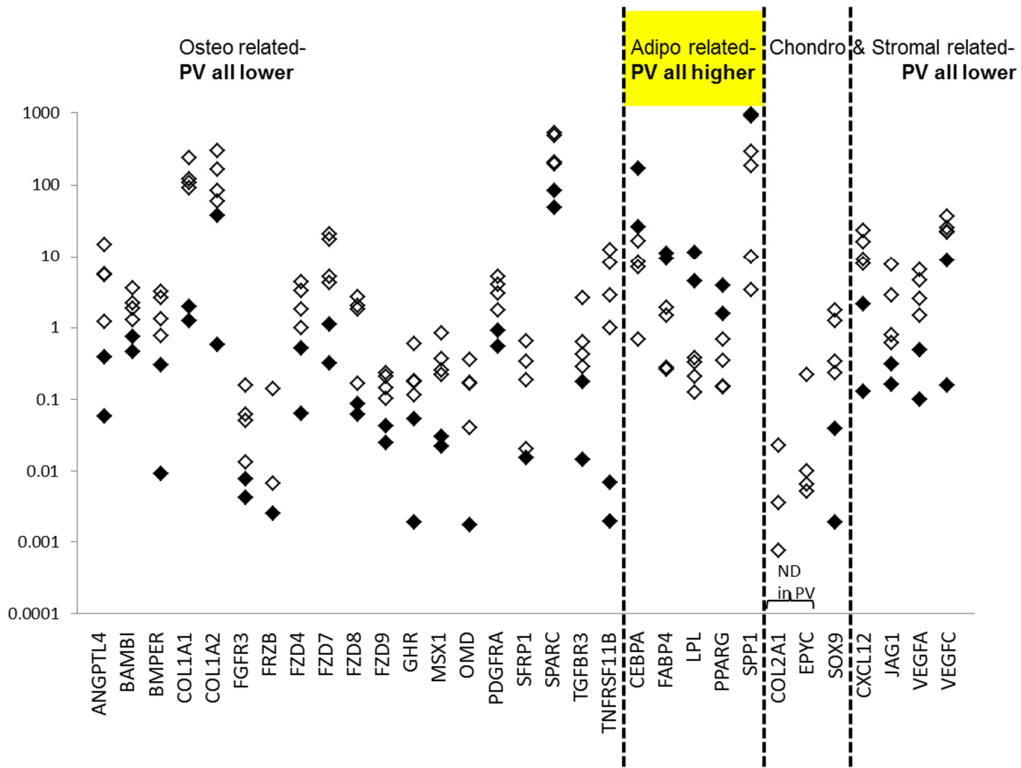

Black diamonds = PVB-MSCs, open diamonds FVB-MSCs. ND = not detected
